1 **Comparative analysis of histone H3K4me3 modifications between early embryos**  
2 **and somatic tissues in cattle**

3

4 Mao Ishibashi, Shuntaro Ikeda\*, Naojiro Minami

5 Laboratory of Reproductive Biology, Graduate School of Agriculture, Kyoto University,  
6 Kyoto 606-8502, Japan.

7 \*Corresponding author

8 **Email:** ikeda.syuntaro.6u@kyoto-u.ac.jp

9 <https://orcid.org/0000-0002-4939-2135>

10

11 **Keywords**

12 cattle, early embryos, epigenome, histone, H3K4me3

13

14 **Abstract**

15 Epigenetic changes induced in the early developmental stages by the surrounding environment  
16 can have not only short-term but also long-term consequences throughout life. This concept  
17 constitutes the “Developmental Origins of Health and Disease” (DOHaD) hypothesis and  
18 encompasses the possibility of controlling livestock health and diseases by epigenetic regulation  
19 during early development. As a preliminary step for examining changes of epigenetic  
20 modifications in early embryos and their long-lasting effects in fully differentiated somatic tissues,  
21 we aimed to obtain high-throughput genome-wide histone H3 lysine 4 trimethylation (H3K4me3)  
22 profiles of bovine early embryos and to compare these data with those from adult somatic tissues  
23 in order to extract common and typical features between these tissues in terms of H3K4me3  
24 modifications. Bovine blastocysts were produced *in vitro* and subjected to chromatin  
25 immunoprecipitation-sequencing analysis of H3K4me3. Comparative analysis of the blastocyst-  
26 derived H3K4me3 profile with publicly available data from adult liver and muscle tissues  
27 revealed that the blastocyst profile could be used as a “sieve” to extract somatic tissue-specific  
28 modifications in genes closely related to tissue-specific functions. Furthermore, principal  
29 component analysis of the level of common modifications between blastocysts and somatic  
30 tissues in meat production-related and imprinted genes well characterized inter- and intra-tissue  
31 differences. The results of this study produced a referential genome-wide H3K4me3 profile of  
32 bovine early embryos and revealed its common and typical features in relation to the profiles of  
33 adult tissues.

34 **Supplementary information:** Supplementary data are submitted along with the main manuscript.  
35 The ChIP-seq datasets for bovine blastocysts have been deposited in the Gene Expression  
36 Omnibus of NCBI with accession number GSE161221.

37

## 38 **1 Introduction**

39 The periconceptional period of mammalian embryonic development is a critical window  
40 during which diverse environmental factors surrounding the embryo have not only short-term  
41 consequences such as effects on immediate embryonic development, but also long-term  
42 consequences including lasting influences on metabolic, developmental, and etiologic processes  
43 throughout gestation and even during postnatal and adult life (Sun, et al., 2015). During  
44 preimplantation development, dynamic epigenetic rearrangements occur, including substantial  
45 changes in DNA methylation and histone modifications, which regulate specific and heritable  
46 patterns of gene expression (Liu, et al., 2016; Wang, et al., 2018; Wang, et al., 2014). As the  
47 epigenome is dynamically formed during the preimplantation period, environmental intervention-  
48 induced changes in epigenome formation during this period have been considered as one of the  
49 possible causes of the long-lasting influences induced by the periconceptional environment (Sun,  
50 et al., 2015). This concept constitutes the “Developmental Origins of Health and Disease”  
51 (DOHaD) hypothesis and encompasses the possibility of controlling health and diseases in later  
52 life by epigenetic regulation during early development.

53 Some phenotypic changes in the field of livestock production can be discussed in the context  
54 of DOHaD given that early life events during prenatal and early postnatal development often  
55 affect traits, including those of economic importance (Chavatte-Palmer, et al., 2015; Gonzalez-  
56 Bulnes, et al., 2016; Sinclair, et al., 2016). For example, *in vitro* handling of ruminant early  
57 embryos in assisted reproductive technology increases the risk of fetal overgrowth syndrome  
58 (Chen, et al., 2015; Young, et al., 1998), whereas maternal nutrition, stress, or illness during  
59 pregnancy can affect productive traits such as postnatal growth, milk yield, carcass composition,  
60 and fertility (Chavatte-Palmer, et al., 2015; Gonzalez-Bulnes, et al., 2016; Sinclair, et al., 2016).

61 Although the epigenetic modifications that occur during the early developmental period,  
62 which persist in differentiated tissues, are considered a major mechanism of DOHaD, there is few  
63 comparative studies of histone modifications between early embryos and fully differentiated  
64 somatic tissues (Huang, et al., 2019). As a preliminary step for examining the changes of  
65 epigenetic modifications in early embryos and their long-lasting effects in later life, the  
66 elucidation of the common and typical features of epigenetic modifications between these two  
67 developmental stages is worth studying. In particular, accumulating evidence suggests that  
68 histone modifications at developmentally important genes, compared with DNA methylation, are  
69 more susceptible to the surrounding environment during the preimplantation period (Feuer, et al.,  
70 2014; Kudo, et al., 2015). In the present study, we aimed to obtain genome-wide profiles of  
71 histone H3 lysine 4 trimethylation (H3K4me3), a representative marker of active chromatin, in  
72 bovine blastocysts and to compare these profiles with those of adult liver and muscle tissues,  
73 which have been deposited in public databases. We examined whether we can extract the  
74 common and typical H3K4me3 features of early embryos and adult somatic tissues.

75

## 76 **2 Materials and Methods**

### 77 **2.1 In vitro production of bovine embryos**

78 This study was approved by the Animal Research Committee of Kyoto University (Permit

79 Numbers 31-10) and was carried out in accordance with the Regulation on Animal  
80 Experimentation at Kyoto University. The bovine ovaries used in the study were purchased from  
81 a commercial abattoir as by-products of meat processing, and the frozen bull semen used for *in*  
82 *vitro* fertilization (IVF) was also commercially available. *In vitro* production of bovine embryos  
83 by IVF was performed as previously described (Ikeda, et al., 2018) except for that 50- $\mu$ L drops of  
84 culture medium were used in *in vitro* culture after IVF. Blastocyst-stage embryos at 192 h post  
85 IVF were collected as approximately 11 embryos per biological replicate for Chromatin  
86 Immunoprecipitation (ChIP).

87

## 88 **2.2 ChIP**

89 ChIP for small cell numbers was performed with a Low Cell ChIP-Seq Kit (Active Motif)  
90 according to the manufacturer's manual (version A3) with some modifications. The blastocysts  
91 were freed from the zona pellucida by using pronase before crosslinking with formaldehyde.  
92 After crosslink-quenching, the sample was sonicated to shear chromatin using a Bioruptor UCD-  
93 250 (Cosmo Bio) for 30 x 30 s with 30-s pauses in ice-water. The sample was centrifuged for 2  
94 min at 18,000 x g and the supernatant (200  $\mu$ L) was transferred to a new tube. The 200- $\mu$ L sample  
95 of sheared chromatin was divided into a 10- $\mu$ L aliquot as "input" and the rest (190  $\mu$ L). The latter  
96 aliquot was processed for ChIP using 3  $\mu$ g anti-H3K4me3 antibody (pAb-003-050, Diagenode) as  
97 indicated in the user manual. The input and ChIPed DNA was decrosslinked, purified, and  
98 resuspended in 40- $\mu$ L low-EDTA TE buffer. The DNA samples were processed for library  
99 preparation for next-generation sequencing by using a Next Gen DNA Library Kit (Active Motif)  
100 following the manufacturer's manual. The specific enrichment of H3K4me3 in the ChIP-seq  
101 libraries was validated by quantitative PCR for positive (1st exon-intron boundary of *GAPDH*)  
102 and negative (2nd exon of *MB*) regions.

103

## 104 **2.3 Sequencing and data processing**

105 Sequencing was performed on a HiSeq2500 (Illumina) as single-end 51-base reads. The  
106 sequencing reads were quality checked and aligned to the bovine genome  
107 (*Bos\_taurus\_UMD\_3.1.1/bosTau8*, June 2014) except for scaffolds using Bowtie (Langmead, et  
108 al., 2009). The mapping duplicates were removed by Picard  
109 (<http://broadinstitute.github.io/picard/>). The peaks were called in the ChIP samples relative to the  
110 respective input samples using MACS (Zhang, et al., 2008). The annotation of called peaks to  
111 genomic regions was generated using CEAS (Shin, et al., 2009) and the peak occupancy rates  
112 were in its output. Average H3K4me3 enrichment profiles and heat maps were generated by  
113 ngs.plot (Shen, et al., 2014), and peak areas were calculated from its output. Gene ontology  
114 analysis was performed using the DAVID tool (Huang da, et al., 2009; Huang da, et al., 2009).  
115 ChIP-peaks were visualized using the Integrative Genomics Viewer (IGV) (Robinson, et al.,  
116 2011). The publicly available raw data for bovine liver and muscle were processed as described  
117 above except for the lack of input sample in the muscle sample. The common and specific peaks  
118 between samples were identified using bedtools (<https://bedtools.readthedocs.io/en/latest/>) with  
119 the default and -v option, respectively. Principal component analysis (PCA) was performed using  
120 SPSS with autoscaling of peak areas (SPSS Inc.).

121

## 122 **2.4 Publicly available data**

123 The following raw data from publicly available databases were used: ChIP-seq of bovine liver,  
124 Bull4 and Bull5 of E-MTAB-2633 (Villar, et al., 2015); ChIP-seq of bovine muscle (longissimus  
125 dorsi), GSM1517452 of GSE61936 (Zhao, et al., 2015); and RNA-seq of bovine blastocysts,  
126 GSM1265773, GSM1265774, and GSM1265773 of GSE52415 (Graf, et al., 2014). For RNA-seq  
127 data, the three datasets were merged and expression levels in RPKM values were calculated as  
128 previously described (Ishitani, et al., 2020). The genes were evenly divided into three categories  
129 as high, medium, and low expression levels according to the calculated RPKM values.

130

## 131 **3. Results**

### 132 **3.1 H3K4me3 profile in bovine blastocysts**

133 We performed ChIP-seq analysis of H3K4me3 using three biological replicates of bovine  
134 blastocysts (n = ~11 per replicate) derived from two independent IVF procedures. Pairwise  
135 comparisons of the ChIP signals in the biological replicates showed the high reproducibility of  
136 our method (Supplementary Fig. S1). We detected about 20,000 significant peaks throughout the  
137 genome (Supplementary Table S1 and Fig. 1A). Approximately 20% of the peaks were located on  
138 gene promotor regions (Fig. 1B). Figure 1C shows a snapshot of the H3K4me3 landscape in a 50-  
139 kb region (chromosome 5) that encompasses the transcription start site (TSS) of *GAPDH*, which  
140 is a representative positive region for H3K4me3 modifications (Herrmann, et al., 2013). Figure  
141 1C demonstrates the clear enrichment of H3K4me3 at this region. Average profile plotting of the  
142 H3K4me3 signal around the genome-wide TSS regions showed similar profiles among the  
143 replicates and exhibited asymmetric bimodal peaks with a valley at TSSs that are considered to be  
144 nucleosome-free regions (Jiang and Pugh, 2009) (Fig. 1D). As expected, average profile plotting  
145 around gene bodies categorized by gene groups with different expression levels revealed that  
146 highly expressed gene groups had more extensive H3K4me3 modifications (Fig. 1E).

147

### 148 **3.2 Characterization of embryonic- and somatic tissue-specific H3K4me3 modifications**

149 We explored the tissue-specific H3K4me3 modifications between preimplantation embryos and  
150 somatic tissues. First, 14,018 overlapping peaks identified from two liver ChIP datasets in a  
151 public database (bulls 4 and 5 in E-MTAB-2633 (Villar, et al., 2015)) were designated as the liver  
152 peaks. On the other hand, the 20,298 overlapping peaks identified from our ChIP data from  
153 blastocysts (blastocysts 1 and 3, which exhibited the two highest peak numbers) were designated  
154 as the blastocyst peaks. Then, we merged these peak groups and extracted 1,899 and 7,901 liver-  
155 and blastocyst-specific peaks, respectively (Fig. 2A). From the genes that harbored these tissue-  
156 specific peaks within  $\pm 3,000$  bp of the TSS, those with the top 100 peak occupancy rates were  
157 subjected to gene ontology (GO) analysis using the web-based DAVID tool (Huang da, et al.,  
158 2009; Huang da, et al., 2009). As a result, the genes with liver-specific peaks enriched the GO  
159 terms closely related to liver function such as “organic acid metabolic processes”, whereas the  
160 genes with blastocyst-specific peaks significantly enriched embryonic development-related GO  
161 terms such as “embryo development” and “cell fate commitment” (Fig. 2B). Such tissue function-  
162 related GO enrichment was not obtained from the liver and blastocyst peaks, without subtraction

163 of the common peaks; in other words, analysis using these peak-associated genes generated only  
164 common and broad GO terms (Table S2). Figure 2C shows the representative liver- and  
165 blastocyst-specific peaks around the TSSs of *ARG1* and *GATA2*, respectively.

166 We applied the same strategy to characterize muscle tissue in terms of the H3K4me3 profile.  
167 We used publicly available H3K4me3 data from the longissimus dorsi muscle of beef cattle (Zhao,  
168 et al., 2015) and compared them with our blastocyst data. GO analysis using the muscle peaks  
169 generated broad terms again; however, the top 10 significant GO terms generated by the muscle-  
170 specific peaks extracted by comparison with the blastocyst peaks all contained the word “muscle”  
171 (Fig. 3A and B). The genes participating in the enriched GO terms identified muscle function-  
172 related genes with H3K4me3 modifications (Fig. 3C).

173

### 174 **3.3 Characterization of common H3K4me3 modifications in blastocysts and liver**

175 We next characterized the genes that harbored common H3K4me3 modifications in blastocyst  
176 and liver. Among the publicly available bovine H3K4me3 data from somatic tissues (liver and  
177 muscle), the liver data were relatively comparable with our blastocyst data in terms of available  
178 read numbers, average profiles of the gene groups of interest (Figs. 4A and 5A), and the  
179 enrichment profiles of representative positive regions (Fig. S2A). However, the muscle data did  
180 not meet these criteria (Fig. S2A and B) and we did not analyze these data further. At first, we  
181 focused on meat production-related genes given that meat production is one of the most important  
182 economic traits in beef cattle. We used the list of meat production-related genes produced by  
183 Williams et al. on the basis of biological roles, which might influence muscle development,  
184 structure, metabolism, or meat maturation (Williams, et al., 2009). The 504 listed genes were  
185 curated with RefSeq mRNA accession numbers and official gene symbols, which narrowed down  
186 the gene number to 438. Of these, 216 harbored H3K4me3 peaks within  $\pm 3,000$  bp of TSSs both  
187 in blastocysts and liver, and 203 genes were recognized by the ngsplot program (Shen, et al.,  
188 2014) to calculate peak area around the TSSs. The processed gene list is shown in Table S3.  
189 Figure 4A shows the average profile plot of the 203 genes in the samples (three blastocyst and  
190 two liver samples). Given that the overall profiles were similar, we considered that the study-  
191 dependent bias in the peak area was negligible and the peak area could be compared among the  
192 samples. Therefore, the peak areas at these genes were subjected to PCA. As a result, PC1 well  
193 characterized the inter-tissue differences of H3K4me3 modifications, the levels of which are  
194 largely different between blastocysts and liver, even though they are common modifications (Fig.  
195 4B and C). For example, *CROT* had lower H3K4me3 levels in blastocysts (autoscaled area [mean  
196  $\pm$  standard deviation],  $-0.68 \pm 0.26$ ) compared with liver ( $1.02 \pm 0.62$ ), whereas *ALDH5A1*  
197 exhibited the opposite pattern ( $0.71 \pm 0.23$  for blastocysts and  $-1.07 \pm 0.14$  for liver). The genes  
198 largely contributing to PC2 exhibited relatively large intra-tissue deviations; for example,  
199 *PPP3CA* exhibited  $-0.21 \pm 1.01$  in blastocysts and  $0.32 \pm 1.25$  in liver (Fig. 4C).

200 We then investigated H3K4me3 peaks that are common in blastocysts and liver in terms of  
201 imprinted genes given that these genes are profoundly involved in the etiology of fetal  
202 developmental disorders (Chen, et al., 2015) and genomic imprinting is also closely associated  
203 with the meat production traits of livestock (Neugebauer, et al., 2010; Okamoto, et al., 2019). The  
204 TSSs of 105 known imprinted genes listed in a previous bovine study (Chen, et al., 2015) and two  
205 differentially methylated regions (DMRs) related to bovine fetal overgrowth (KvDMR1 of

206 *KCNQ1OT1* and *IGF2R/AIRN* DMR) were selected for investigation, and we found that 30 TSSs  
207 and the two DMRs had H3K4me3 peaks both in blastocysts and liver. The average profile plot of  
208 the 30 TSSs again exhibited overall similar profiles between the two different tissues (Fig. 5A).  
209 Meanwhile, we could also extract tissue-specific H3K4me3 modifications, as shown in Fig. S3.  
210 PCA of the common peaks in the two tissues extracted the inter- (PC1) and intra-tissue (PC2)  
211 differences represented by differential patterns of H3K4me3 modifications among the tissues and  
212 samples. The imprinted genes *IGF2R* (with *IGF2R/AIRN* DMR) and *KCNQ1OT1* (with  
213 KvDMR1), both of which are implicated in fetal overgrowth syndrome (Chen, et al., 2015),  
214 exhibited a relatively high contribution to intra-tissue differences (PC2).  
215

## 216 **4 Discussion**

217 To our knowledge, only one study has assessed genome-wide histone modifications of bovine  
218 early embryos (Org, et al., 2019). That report was a pioneering study of the issue; however, due to  
219 its emphasis on an unconventional ChIP methodology to reduce sample cell numbers, H3K4me3  
220 landscape that was produced was compromised by a lack of valley-like patterns around TSSs that  
221 correspond to nucleosome-free regions (Fig. S4) (Jiang and Pugh, 2009). The present ChIP-seq  
222 analysis of H3K4me3 successfully generated the typical landscape of epigenetic modifications  
223 around TSSs (Figs. 1D and Fig. S4). In addition, the clear enrichment of H3K4me3 modifications  
224 at TSSs and their correlation with the expression levels of the corresponding genes (Fig. 1)  
225 support the accuracy of our results. Therefore, the H3K4me3 profile produced in this study might  
226 be useful as a new reference for bovine early embryos.

227 We compared this high-resolution H3K4me3 profile of bovine blastocysts with those of  
228 somatic tissues (liver and muscle) to elucidate common and typical epigenetic modifications  
229 between early embryos and differentiated somatic tissues. Interestingly, the H3K4me3 peaks of  
230 blastocysts could be used like a “sieve” to extract somatic tissue-specific peaks in genes closely  
231 related to tissue-specific functions. Although the genes with the top 100 highest peak occupancy  
232 rates in blastocysts, liver, and muscle did not represent the specific functions of each tissue, their  
233 counterparts after subtracting genes with common peaks (i.e., “sieving”) clearly did (Figs. 2B and  
234 3B and Table S2). These results suggest that high-throughput histone methylome data from early  
235 embryos are useful for sieving the methylome of other somatic tissues to characterize them in  
236 terms of the tissue-specific modifications that are related to their functions.

237 The common epigenetic modifications between early embryos and somatic tissues are  
238 important from the viewpoint of DOHaD, because they represent candidate modifications  
239 responsible for the epigenetic persistence-derived long-term consequences of early life conditions.  
240 In this study, the common peaks between blastocysts and liver were investigated with a focus on  
241 meat production-related genes. PCA of peak areas at TSSs well characterized inter-tissue  
242 differences (Fig. 4B and C); in other words, the genes highly contributing to PC1 represented  
243 H3K4me3 modifications that are largely different between blastocysts and liver, even though they  
244 are “common” modifications (e.g., *ALDH5A1* and *CROT*). On the other hand, PC2 might mirror  
245 intra-tissue differences rather than inter-tissue ones, for example, such as *PPP3CA* (Fig. 4C).

246 In addition to meat production-related genes, we also focused on imprinted genes. Genomic

247 imprinting is an epigenetic phenomenon that compels a subset of genes to be monoallelically  
248 expressed in a parent-of-origin-dependent manner in mammals (Bartolomei and Ferguson-Smith,  
249 2011). Appropriate monoallelic expression of imprinted genes is crucial for normal fetal growth,  
250 and environmental perturbation during early embryonic development, including the use of  
251 assisted reproductive technology, can induce a loss of imprinting of these genes, leading to  
252 abnormal fetal overgrowth syndrome (Chen, et al., 2015). Furthermore, genomic imprinting  
253 effects have been widely documented in the economic traits of livestock animals. For example, in  
254 beef cattle, several reports have described large relative imprinting variance (i.e., the proportion  
255 of total genetic variance attributable to imprinted genes) such as for fat score (24.8% for German  
256 Simmental bulls (Neugebauer, et al., 2010)) and beef marbling score (35.2% for Japanese Black  
257 bulls (Okamoto, et al., 2019)). Although DNA methylation has been characterized as a major code  
258 of genomic imprinting, recent studies reported DNA methylation-independent imprinting that is  
259 controlled by histone methylation (Inoue, et al., 2017). In addition, the global dysregulation of  
260 imprinted genes in assisted reproductive technology-induced fetal overgrowth is often  
261 independent of DNA methylome epimutations (Chen, et al., 2015; Chen, et al., 2017). These  
262 findings suggest the importance of histone methylation in the expression of imprinted genes. In  
263 the present study, we categorized H3K4me3 modifications on imprinted genes into tissue-specific  
264 (Fig. S3), common but relatively tissue-dependent (Fig. 5B, PC1 contributions), and common  
265 (Fig. 5B, PC2 contributions) modifications. Interestingly, the imprinted genes *IGF2R* and  
266 *KCNQ1OT1*, which are well documented in fetal overgrowth syndrome (Chen, et al., 2015),  
267 exhibited a relatively high contribution to intra-tissue differences (PC2), suggesting that these  
268 H3K4me3 modifications are common in early embryos and hepatic tissues and diverse among  
269 individuals and/or given conditions. Collectively, the appropriate controlling of these histone  
270 modifications in developmentally, and hence, economically important genes in the early life  
271 period might result in phenotypic changes to improve the welfare and production traits of farm  
272 animals. The effects of environmental conditions and the development-dependent changes on  
273 epigenetic modifications and the feasibility of controlling them remain targets for future research.

274 In conclusion, the present study produced a referential H3K4me3 landscape of bovine early  
275 embryos and revealed its common and typical features compared with adult tissues.

276

### 277 **Acknowledgments**

278 The authors deeply thank the staff at the Kyoto-Meat-Market for allowing us access to bovine  
279 ovaries.

280

### 281 **Funding Information**

282 This work was supported in part by the Japan Society for the Promotion of Science [19H03104 to  
283 S.I., 19H03136 to N.M.].

284

### 285 **Conflicts of Interest**

286 None.

287

### 288 **Data Availability**

289 The ChIP-seq datasets for bovine blastocysts have been deposited in the Gene Expression  
290 Omnibus of NCBI with accession number GSE161221.

291

## 292 **Author Contributions**

293 M.I., S.I., and N.M. conceived the experiments and drafted the manuscript. M.I. performed  
294 bovine IVF and ChIP-seq library preparation and sequencing. M.I. and S.I. analyzed the ChIP-seq  
295 results. N.M. supported the experiments and analyses. All authors discussed the results and  
296 approved the manuscript.

297

## 298 **Figure Legends**

299 **Figure 1.** Overview of H3K4me3 ChIP-seq results in bovine blastocysts. (A and B) Distribution  
300 of H3K4me3 peaks in each chromosome (A) and in corresponding genic and intergenic regions  
301 (B). These figures were generated by the CEAS (Shin, et al., 2009) tool using the H3K4me3\_1  
302 (Blastocyst\_1) sample. (C) Snapshot of the H3K4me3 landscape in a 50-kb region (chromosome  
303 5) that encompasses the *GAPDH* TSS. The ChIP peaks in the three biological replicates were  
304 visualized using the Integrative Genomics Viewer (Robinson, et al., 2011). (D) Average profile  
305 plot of the H3K4me3 signal around the genome-wide TSSs. The three biological replicates are  
306 shown. (E) Average profile plot around gene bodies categorized by gene groups with different  
307 expression levels based on GSE52415 (Graf, et al., 2014). The H3K4me3\_1 sample was used to  
308 generate the figure. The average profile plots were generated by ngs.plot (Shen, et al., 2014).

309 **Figure 2.** Characterization of blastocyst- and liver-specific H3K4me3 modifications. (A)  
310 Processing of ChIP-peaks in liver and blastocyst samples. The numbers show those of the peaks.  
311 The sum of common (intersect) and specific peak numbers is not equal to the original peak  
312 number in each sample because some peaks were separated into multiple peaks to represent  
313 intersects. (B) Top 10 significant GO terms for biological process enriched by the genes with the  
314 top 100 highest peak occupancy rates. Gene n. represents the numbers of related genes. FDR(B)  
315 indicates the Benjamin false discovery rate. (C) Examples of the H3K4me3 landscape of liver-  
316 (*ARG1*) and blastocyst-specific (*GATA2*) peaks around their TSSs. Five-kb graduations are shown  
317 in the top scale.

318 **Figure 3.** Characterization of blastocyst- and muscle-specific H3K4me3 modifications. (A)  
319 Processing of ChIP-peaks in muscle and blastocyst samples. The numbers show those of the  
320 peaks. The sum of common (intersect) and specific peak numbers is not identical to the original  
321 peak number in each sample because some peaks were separated into multiple peaks to represent  
322 intersects. (B) Top 10 significant GO terms for biological process enriched by the genes with the  
323 top 100 highest peak occupancy rates. Gene n. represents the numbers of related genes. FDR(B)  
324 indicates the Benjamin false discovery rate. (C) Examples of the H3K4me3 landscape for muscle-  
325 specific peaks (*MYOG* and *CAPN3*) around their TSSs. Five-kb graduations are shown in the top  
326 scale.

327 **Figure 4.** Characterization of H3K4me3 modifications common in blastocysts and liver in terms  
328 of meat production-related genes. (A) Average profile plot of the H3K4me3 signal around the  
329 TSSs of 203 meat production-related genes. (B) PCA of liver and blastocyst samples considering  
330 the peak areas around the TSSs of 203 meat production-related genes. Left and right panels show  
331 the principal component plot of all samples and loading plot of the 203 genes, respectively. The  
332 genes whose H3K4me3 landscapes are shown in (C) are highlighted in red. (C) H3K4me3



333 landscapes of *CROT*, *PPP3CA*, and *ALDH5A1* around their TSSs. Five-kb graduations are shown  
334 in the top scale.

335 **Figure 5.** Characterization of H3K4me3 modifications common in blastocysts and liver in terms  
336 of imprinted genes. (A) Average profile plot of the H3K4me3 signal around the TSSs of 30  
337 imprinted genes. (B) PCA of liver and blastocyst samples considering the peak areas around the  
338 30 TSSs of the imprinted genes and two additional DMRs. Left and right panels show the  
339 principal component plot of all samples and loading plot of the loci examined, respectively. The  
340 genes whose H3K4me3 landscapes are shown in (C) are highlighted in red. (C) H3K4me3  
341 landscapes of *GATM*, *IGF2R*, *IGF2R/AIRN* (DMR), *KCNQ1OT1* (DMR), and *IMPACT*. Five-kb  
342 graduations are shown in the top scale.

343

## 344 References

- 345 Bartolomei, M.S. and Ferguson-Smith, A.C. (2011) Mammalian genomic imprinting, *Cold Spring*  
346 *Harb Perspect Biol*, **3**.
- 347 Chavatte-Palmer, P., et al. (2015) The developmental origins of health and disease: importance  
348 for animal production, *Anim Reprod*, **12**, 505-520.
- 349 Chen, Z., et al. (2015) Characterization of global loss of imprinting in fetal overgrowth syndrome  
350 induced by assisted reproduction, *Proc Natl Acad Sci U S A*, **112**, 4618-4623.
- 351 Chen, Z., et al. (2017) Global misregulation of genes largely uncoupled to DNA methylome  
352 epimutations characterizes a congenital overgrowth syndrome, *Sci Rep*, **7**, 12667.
- 353 Feuer, S.K., et al. (2014) Use of a mouse in vitro fertilization model to understand the  
354 developmental origins of health and disease hypothesis, *Endocrinology*, **155**, 1956-1969.
- 355 Gonzalez-Bulnes, A., et al. (2016) Developmental Origins of Health and Disease in swine:  
356 implications for animal production and biomedical research, *Theriogenology*, **86**, 110-119.
- 357 Graf, A., et al. (2014) Fine mapping of genome activation in bovine embryos by RNA sequencing,  
358 *Proc Natl Acad Sci U S A*, **111**, 4139-4144.
- 359 Herrmann, D., et al. (2013) Histone modifications and mRNA expression in the inner cell mass  
360 and trophoctoderm of bovine blastocysts, *Epigenetics*, **8**, 281-289.
- 361 Huang da, W., Sherman, B.T. and Lempicki, R.A. (2009) Bioinformatics enrichment tools: paths  
362 toward the comprehensive functional analysis of large gene lists, *Nucleic Acids Res*, **37**, 1-13.
- 363 Huang da, W., Sherman, B.T. and Lempicki, R.A. (2009) Systematic and integrative analysis of  
364 large gene lists using DAVID bioinformatics resources, *Nat Protoc*, **4**, 44-57.
- 365 Huang, X., et al. (2019) Stable H3K4me3 is associated with transcription initiation during early  
366 embryo development, *Bioinformatics*, **35**, 3931-3936.
- 367 Ikeda, S., Sugimoto, M. and Kume, S. (2018) The RPMI-1640 vitamin mixture promotes bovine  
368 blastocyst development in vitro and downregulates gene expression of TXNIP with epigenetic  
369 modification of associated histones, *J Dev Orig Health Dis*, **9**, 87-94.
- 370 Inoue, A., et al. (2017) Maternal H3K27me3 controls DNA methylation-independent imprinting,  
371 *Nature*, **547**, 419-424.
- 372 Ishitani, H., et al. (2020) Embryonic MTHFR contributes to blastocyst development, *J Assist*  
373 *Reprod Genet*, **37**, 1807-1814.
- 374 Jiang, C. and Pugh, B.F. (2009) Nucleosome positioning and gene regulation: advances through  
375 genomics, *Nat Rev Genet*, **10**, 161-172.
- 376 Kudo, M., et al. (2015) Methionine-dependent histone methylation at developmentally  
377 important gene loci in mouse preimplantation embryos, *J Nutr Biochem*, **26**, 1664-1669.

378 Langmead, B., *et al.* (2009) Ultrafast and memory-efficient alignment of short DNA sequences to  
379 the human genome, *Genome Biol*, **10**, R25.  
380 Liu, X., *et al.* (2016) Distinct features of H3K4me3 and H3K27me3 chromatin domains in pre-  
381 implantation embryos, *Nature*, **537**, 558-562.  
382 Neugebauer, N., *et al.* (2010) Evidence for parent-of-origin effects on genetic variability of beef  
383 traits, *J Anim Sci*, **88**, 523-532.  
384 Okamoto, K., *et al.* (2019) Parent-of-origin effects on carcass traits in Japanese Black cattle, *J*  
385 *Anim Breed Genet*, **136**, 190-198.  
386 Org, T., *et al.* (2019) Genome-wide histone modification profiling of inner cell mass and  
387 trophectoderm of bovine blastocysts by RAT-ChIP, *PLoS One*, **14**, e0225801.  
388 Robinson, J.T., *et al.* (2011) Integrative genomics viewer, *Nat Biotechnol*, **29**, 24-26.  
389 Shen, L., *et al.* (2014) ngs.plot: Quick mining and visualization of next-generation sequencing  
390 data by integrating genomic databases, *BMC Genomics*, **15**, 284.  
391 Shin, H., *et al.* (2009) CEAS: cis-regulatory element annotation system, *Bioinformatics*, **25**, 2605-  
392 2606.  
393 Sinclair, K.D., *et al.* (2016) Epigenetics and developmental programming of welfare and  
394 production traits in farm animals, *Reprod Fertil Dev*.  
395 Sun, C., Velazquez, M.A. and Fleming, T.P. (2015) DOHaD and the periconceptual period, a  
396 critical window in time. In Rosenfeld, C.S. (ed), *The Epigenome and Developmental Origins of*  
397 *Health and Disease*. Academic Press, Cambridge, pp. 33-47.  
398 Villar, D., *et al.* (2015) Enhancer evolution across 20 mammalian species, *Cell*, **160**, 554-566.  
399 Wang, C., *et al.* (2018) Reprogramming of H3K9me3-dependent heterochromatin during  
400 mammalian embryo development, *Nat Cell Biol*, **20**, 620-631.  
401 Wang, L., *et al.* (2014) Programming and inheritance of parental DNA methylomes in mammals,  
402 *Cell*, **157**, 979-991.  
403 Williams, J.L., *et al.* (2009) Discovery, characterization and validation of single nucleotide  
404 polymorphisms within 206 bovine genes that may be considered as candidate genes for beef  
405 production and quality, *Anim Genet*, **40**, 486-491.  
406 Young, L.E., Sinclair, K.D. and Wilmut, I. (1998) Large offspring syndrome in cattle and sheep, *Rev*  
407 *Reprod*, **3**, 155-163.  
408 Zhang, Y., *et al.* (2008) Model-based analysis of ChIP-Seq (MACS), *Genome Biol*, **9**, R137.  
409 Zhao, C., *et al.* (2015) Genome-Wide H3K4me3 Analysis in Angus Cattle with Divergent  
410 Tenderness, *PLoS One*, **10**, e0115358.

411

412

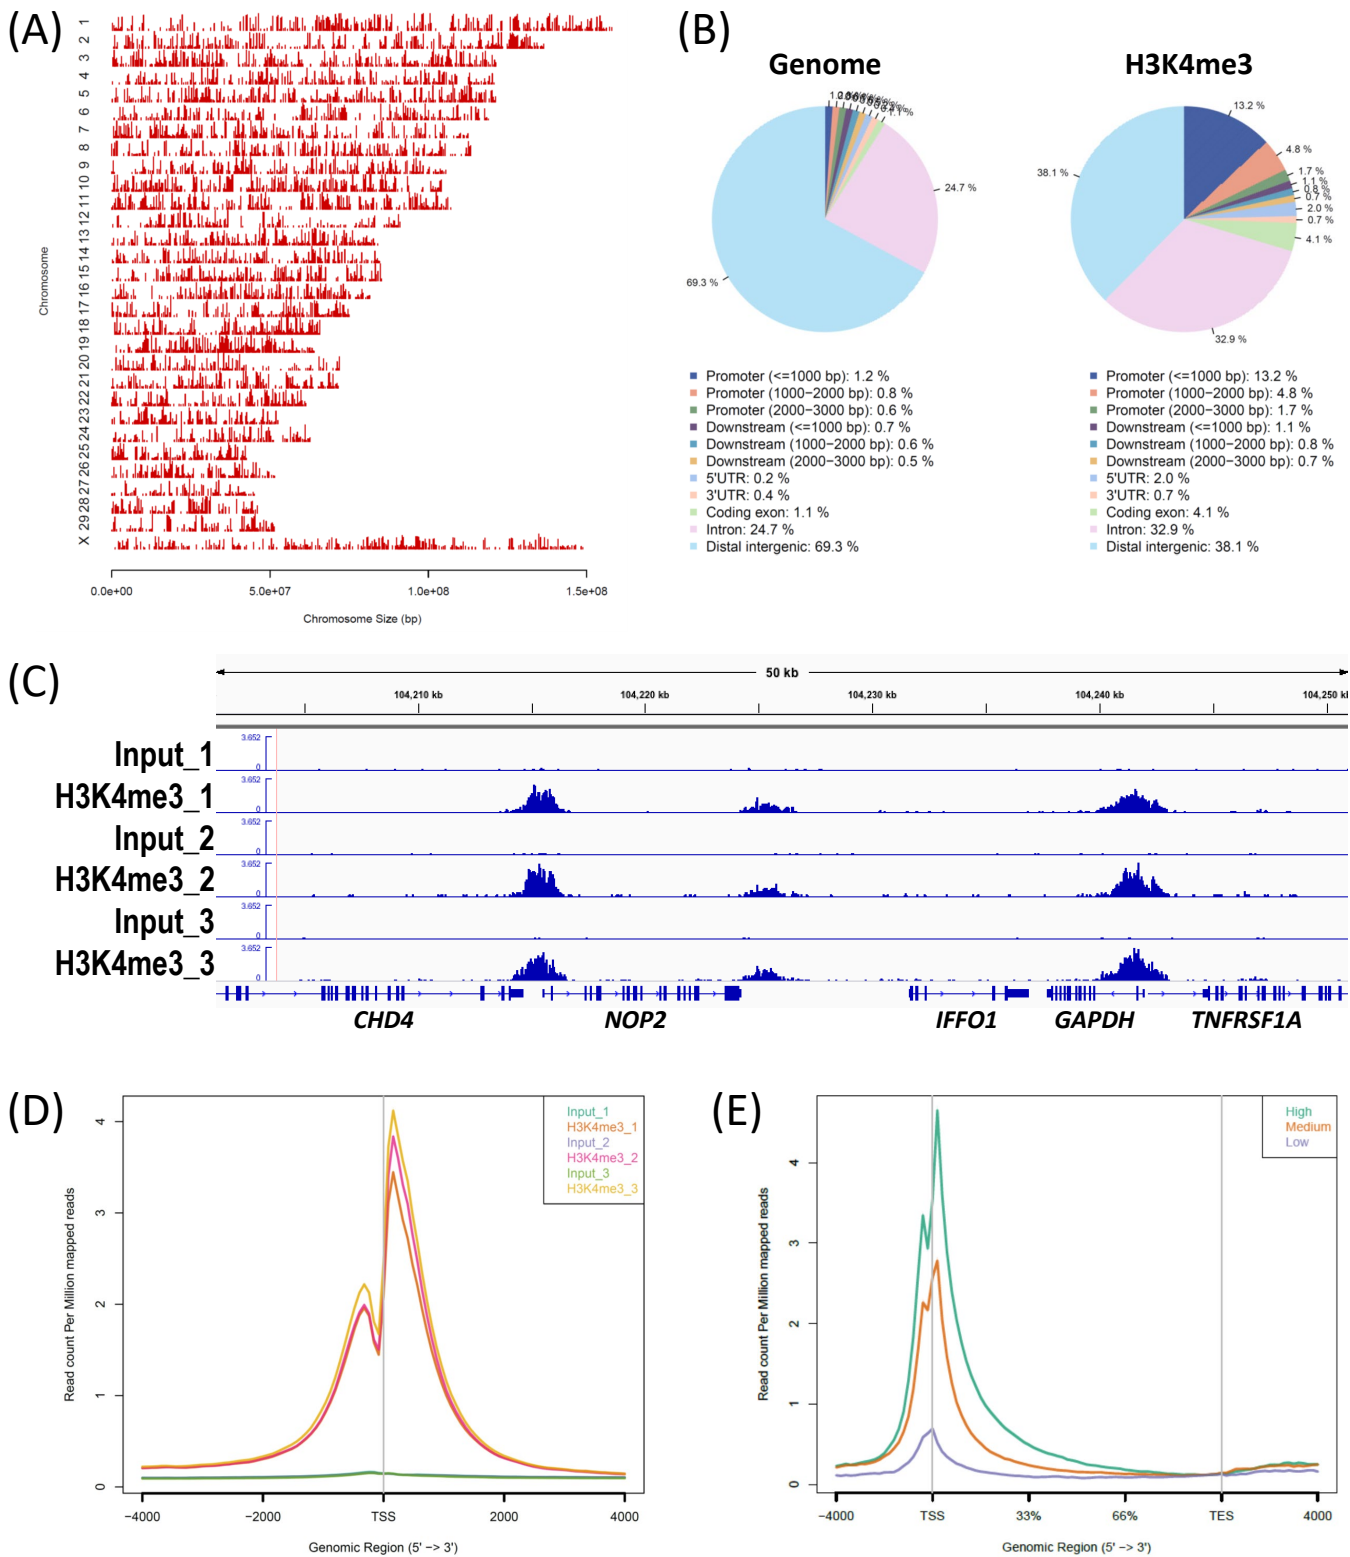

**Fig. 1**

(A) E-MTAB-2633 (Villar et al., 2015)

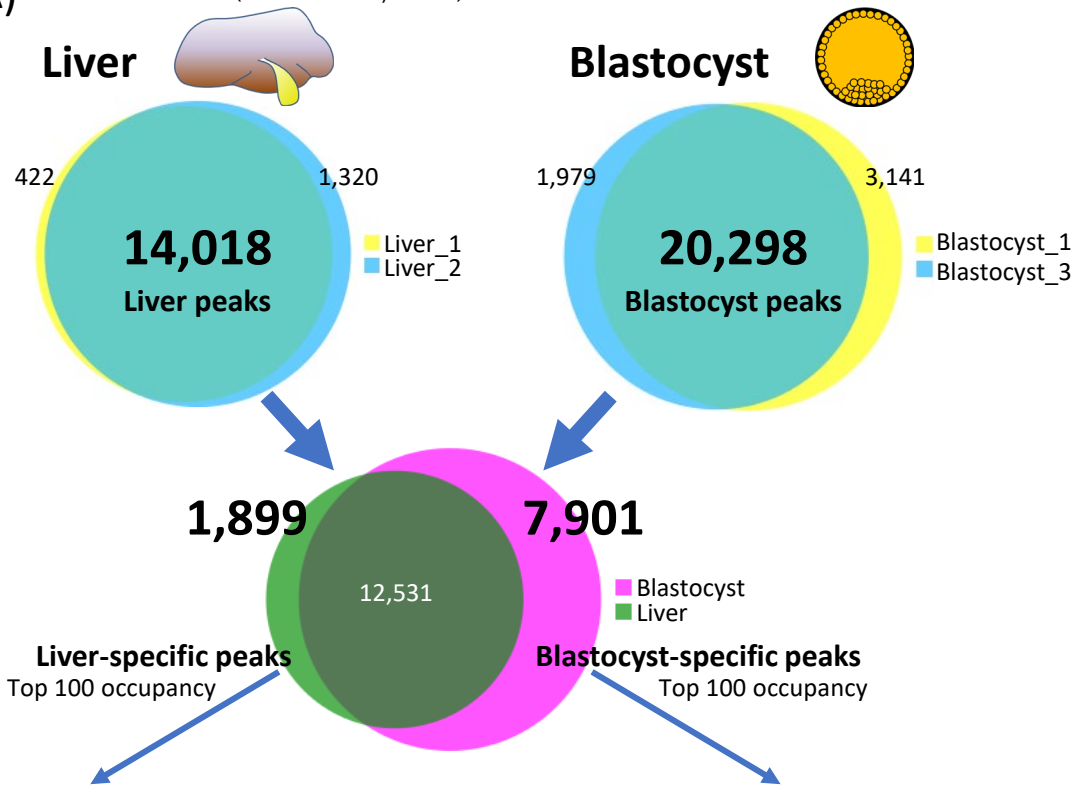

(B) Liver-specific peaks

| GO term                               | Gene n. | FDR(B)   |
|---------------------------------------|---------|----------|
| oxoacid metabolic process             | 23      | 6.80E-09 |
| carboxylic acid metabolic process     | 23      | 1.20E-08 |
| organic acid metabolic process        | 23      | 2.90E-08 |
| monocarboxylic acid metabolic process | 14      | 2.30E-04 |
| cellular amino acid metabolic process | 10      | 6.00E-04 |
| protein activation cascade            | 6       | 1.20E-03 |
| L-phenylalanine catabolic process     | 4       | 1.40E-03 |
| L-phenylalanine metabolic process     | 4       | 1.40E-03 |
| blood coagulation                     | 8       | 4.10E-03 |
| cellular amino acid catabolic process | 6       | 4.30E-03 |

Blastocyst-specific peaks

| GO term                                                  | Gene n. | FDR(B)   |
|----------------------------------------------------------|---------|----------|
| embryonic morphogenesis                                  | 19      | 3.10E-06 |
| embryo development                                       | 22      | 2.50E-05 |
| epithelium development                                   | 21      | 1.10E-04 |
| pattern specification process                            | 14      | 1.40E-04 |
| tube development                                         | 16      | 1.60E-04 |
| tissue morphogenesis                                     | 16      | 1.80E-04 |
| cell fate commitment                                     | 11      | 2.00E-04 |
| anatomical structure formation involved in morphogenesis | 21      | 2.80E-04 |
| morphogenesis of an epithelium                           | 14      | 2.80E-04 |
| regionalization                                          | 12      | 3.10E-04 |

(C)

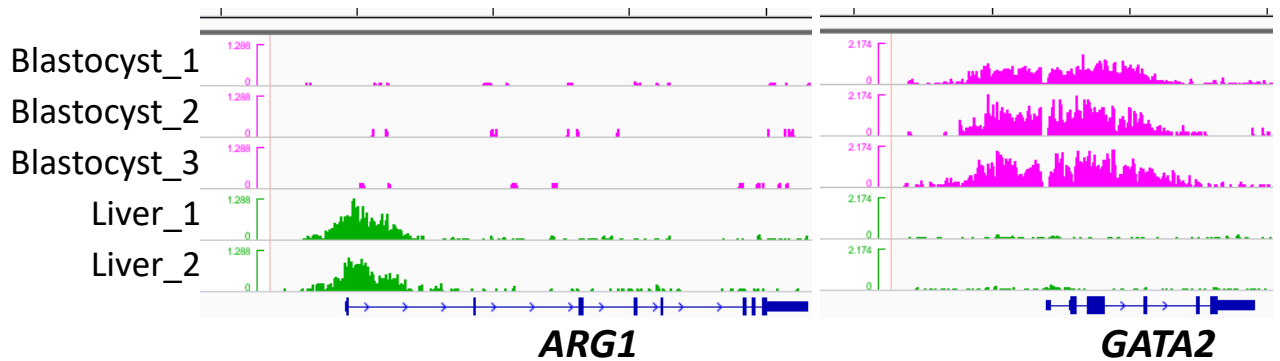

Fig. 2

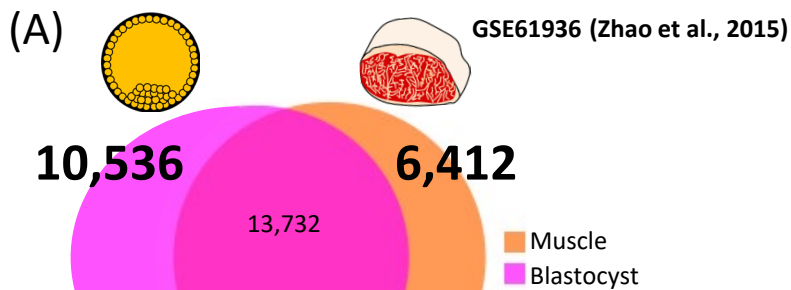

**Muscle peaks**  
Top 100 occupancy

**Muscle-specific peaks**  
Top 100 occupancy

(B) **Muscle peaks**

| GO term                                               | Gene n. | FDR(B)   |
|-------------------------------------------------------|---------|----------|
| purine nucleoside monophosphate metabolic process     | 19      | 7.60E-02 |
| purine ribonucleoside monophosphate metabolic process | 22      | 8.10E-02 |
| ribonucleoside metabolic process                      | 21      | 8.70E-02 |
| purine nucleoside triphosphate metabolic process      | 14      | 8.90E-02 |
| nucleoside metabolic process                          | 16      | 9.00E-02 |
| nucleoside triphosphate metabolic process             | 16      | 9.20E-02 |
| ribonucleoside monophosphate metabolic process        | 11      | 9.30E-02 |
| nucleoside monophosphate metabolic process            | 21      | 9.60E-02 |
| ribonucleoside triphosphate metabolic process         | 14      | 9.80E-02 |
| glycosyl compound metabolic process                   | 12      | 9.90E-02 |

**Muscle-specific peaks**

| GO term                            | Gene n. | FDR(B)   |
|------------------------------------|---------|----------|
| muscle structure development       | 19      | 1.90E-09 |
| muscle system process              | 22      | 9.10E-09 |
| muscle cell development            | 21      | 3.60E-08 |
| muscle contraction                 | 14      | 7.60E-08 |
| striated muscle cell development   | 16      | 1.30E-07 |
| muscle organ development           | 16      | 1.20E-06 |
| skeletal muscle tissue development | 11      | 2.00E-06 |
| striated muscle contraction        | 21      | 2.20E-06 |
| muscle cell differentiation        | 14      | 2.20E-06 |
| skeletal muscle organ development  | 12      | 2.30E-06 |

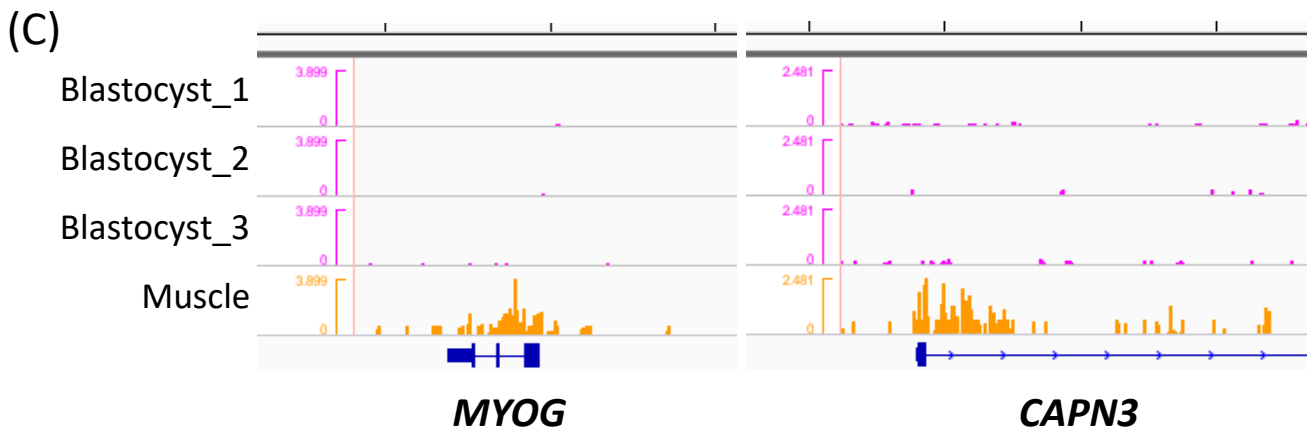

Fig. 3

(A) Meat prod. genes (n=203)

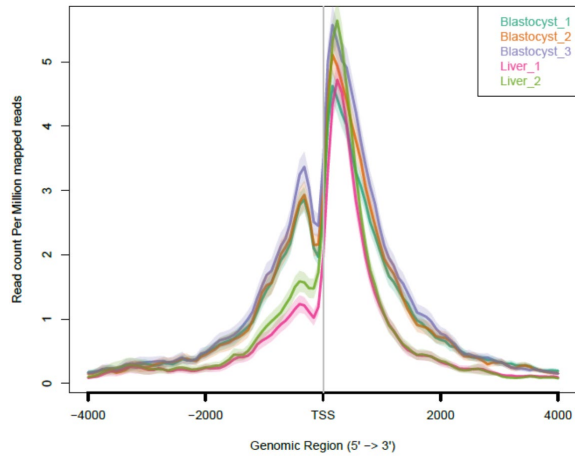

(B)

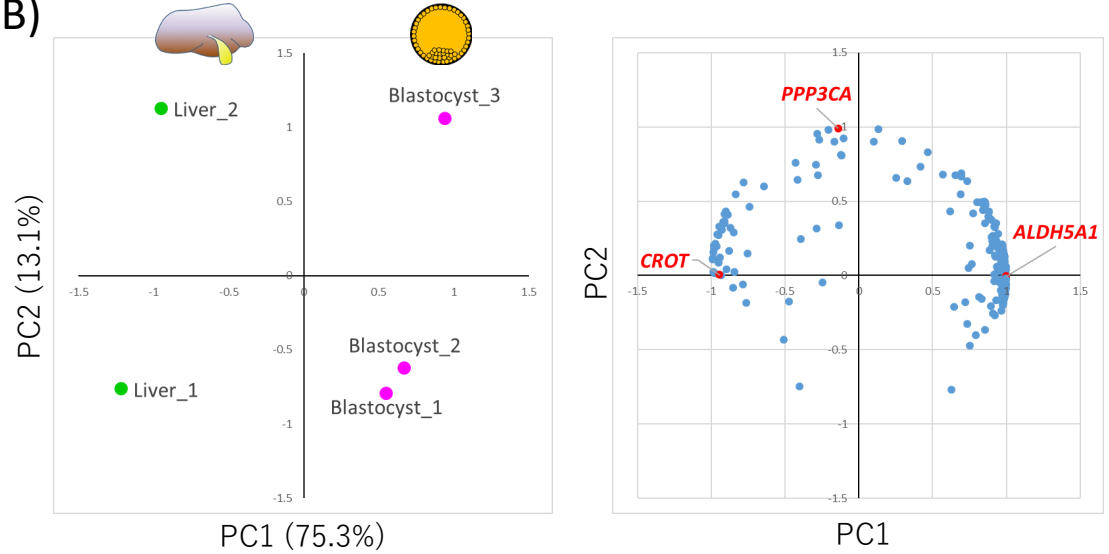

(C)

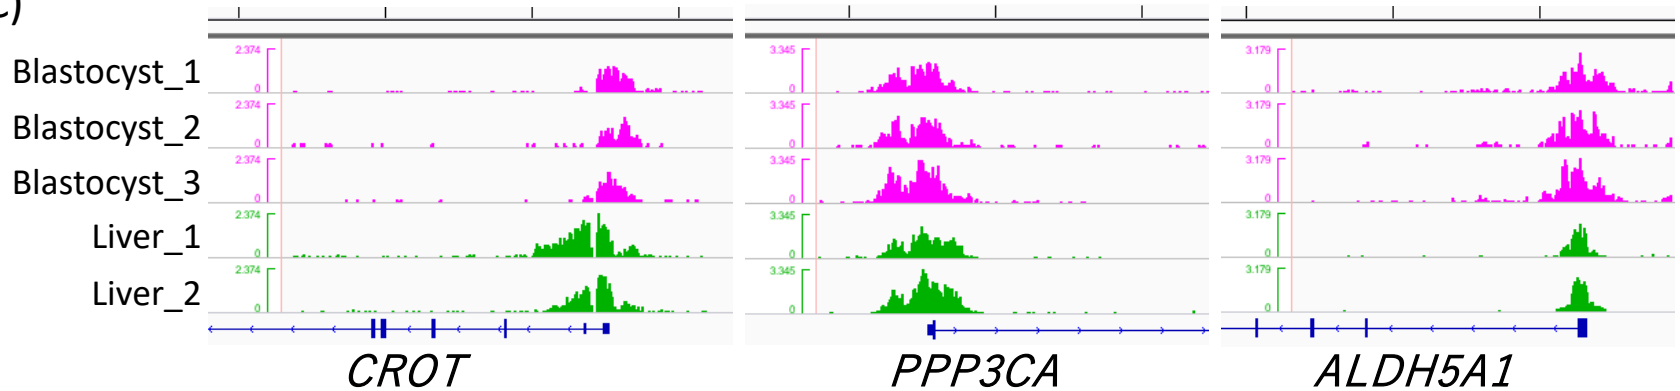

Fig. 4

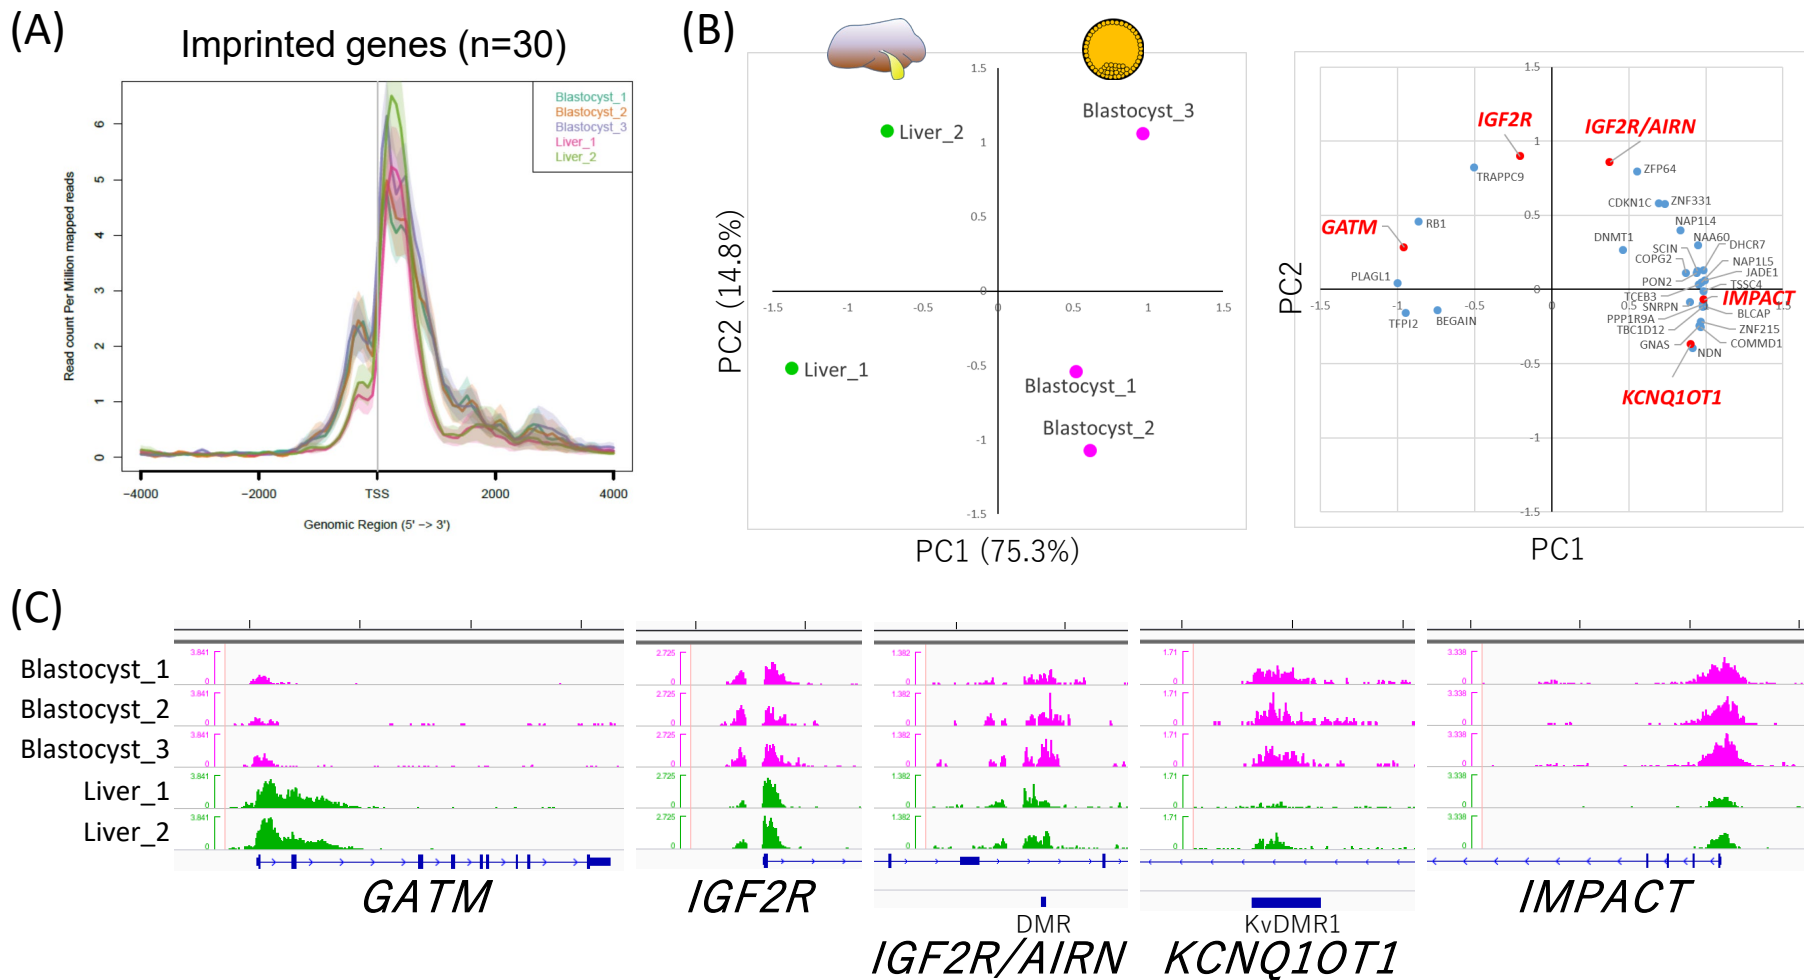

Fig. 5
